# Supplementary material for: The physiological basis of pulmonary arterial hypertension
Source: PubMed Central journal article supplement — Eur Respir J. 2022 Jun 16;59(6):2102334. doi: 10.1183/13993003.02334-2021 (PMC9203839; doi:10.1183/13993003.02334-2021), 2022-06-16

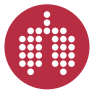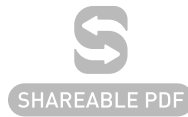

# The physiological basis of pulmonary arterial hypertension

Robert Naeije<sup>1</sup>, Manuel J. Richter<sup>2</sup> and Lewis J. Rubin<sup>3</sup>

<sup>1</sup>Free University of Brussels, Brussels, Belgium. <sup>2</sup>Dept of Internal Medicine, Justus Liebig-University, Universities of Giessen and Marburg Lung Center (UGMLC), Giessen, Germany. <sup>3</sup>University of California, San Diego, La Jolla, CA, USA.

Corresponding author: Robert Naeije ([rnaeije@gmail.com](mailto:rnaeije@gmail.com))

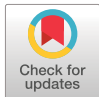

Shareable abstract (@ERSpublications)

**Pulmonary arterial hypertension (PAH) is a dyspnoea-fatigue syndrome diagnosed on the basis of measurements of the pulmonary circulation, lung mechanics, gas exchange and the right heart, whose physiological basis is re-explained and updated** <https://bit.ly/3EhDf24>

**Cite this article as:** Naeije R, Richter MJ, Rubin LJ. The physiological basis of pulmonary arterial hypertension. *Eur Respir J* 2022; 59: 2102334 [DOI: 10.1183/13993003.02334-2021].

This single-page version can be shared freely online.

Copyright ©The authors 2022.

This version is distributed under the terms of the Creative Commons Attribution Non-Commercial Licence 4.0. For commercial reproduction rights and permissions contact [permissions@ersnet.org](mailto:permissions@ersnet.org)

Received: 25 Aug 2021  
Accepted: 18 Oct 2021

## Abstract

Pulmonary arterial hypertension (PAH) is a rare dyspnoea-fatigue syndrome caused by a progressive increase in pulmonary vascular resistance and eventual right ventricular (RV) failure. In spite of extensive pulmonary vascular remodelling, lung function in PAH is generally well preserved, with hyperventilation and increased physiological dead space, but minimal changes in lung mechanics and only mild to moderate hypoxaemia and hypocapnia. Hypoxaemia is mainly caused by a low mixed venous oxygen tension from a decreased cardiac output. Hypocapnia is mainly caused by an increased chemosensitivity. Exercise limitation in PAH is cardiovascular rather than ventilatory or muscular. The extent of pulmonary vascular disease in PAH is defined by multipoint pulmonary vascular pressure–flow relationships with a correction for haematocrit. Pulsatile pulmonary vascular pressure–flow relationships in PAH allow for the assessment of RV hydraulic load. This analysis is possible either in the frequency domain or in the time domain. The RV in PAH adapts to increased afterload by an increased contractility to preserve its coupling to the pulmonary circulation. When this homeometric mechanism is exhausted, the RV dilates to preserve flow output by an additional heterometric mechanism. Right heart failure is then diagnosed by imaging of increased right heart dimensions and clinical systemic congestion signs and symptoms. The coupling of the RV to the pulmonary circulation is assessed by the ratio of end-systolic to arterial elastances, but these measurements are difficult. Simplified estimates of RV–pulmonary artery coupling can be obtained by magnetic resonance or echocardiographic imaging of ejection fraction.

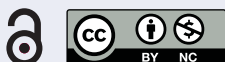

Supplement: ERJ-02334-2021.Shareable.pdf [file ERJ-02334-2021.Shareable.pdf]
